# Supplementary material for: Covalent grafting of polyethyleneimine on hydroxylated three-dimensional graphene for superior CO2 capture
Source: Royal Society of Chemistry journal article supplement (doi:10.1039/c5ta01536g), 2015-01-01
Supplement: c5ta01536g1.pdf [file c5ta01536g1.pdf]

## Supporting Information

### **Covalently-grafted Polyethyleneimine on Hydroxylated Three-dimensional Graphene for Superior CO<sub>2</sub> Capture**

*Fa-Qian Liu, \* Wei Li, Jie Zhao, Wei-Hua Li, \* Dong-Mei Chen, Li-Shui Sun, Lei Wang, and Rong-Xun Li*

**Preparation of MCM-41.** The conventional MCM-41 was hydrothermally synthesized at 100 °C for 40 h using Cab-O-Sil fumed silica as the silica source, 25% solution of tetramethylammonium hydroxide in water (TMAOH) for pH adjustment, and cetyltrimethylammonium bromide (CTAB) as the surfactant template.<sup>1</sup> The molar composition of the mixture was: 1.0 SiO<sub>2</sub> : 0.32 TMAOH : 0.45 CTAB : 67 H<sub>2</sub>O. After the synthesis, the solid product was recovered by filtration, washed several times with deionized water, dried at 100 °C overnight, and calcined at 550 °C for 5 h to remove the template.

**Preparation of PEI-Impregnated MCM-41-PEI (MCM-41-PEI 70K and MCM-41-PEI 600).** The desired amount of PEI (either high molecular weight ~70000 or low molecular weight ~600) was dissolved in methanol and stirred for 30 minutes. Subsequently, 0.5 gram of MCM-41 was added and stirred for an additional 60 minutes. The methanol was removed under vacuum. The resulting MCM-41-PEI was dried overnight at 60 °C.

**Preparation of chemically tethered MCM-41-PEI (MCM-41-PEI-CT).** Typically, 990 mg of aziridine was added to a suspension of 0.5g dried MCM-41 in toluene. Approximately 120 mg of glacial acetic acid was added to the suspension to catalyze the surface polymerization. The mixture was vigorously stirred at RT for 48 h in a sealed vessel. After completion, the powder was filtered and washed with toluene and finally dried in vacuum.

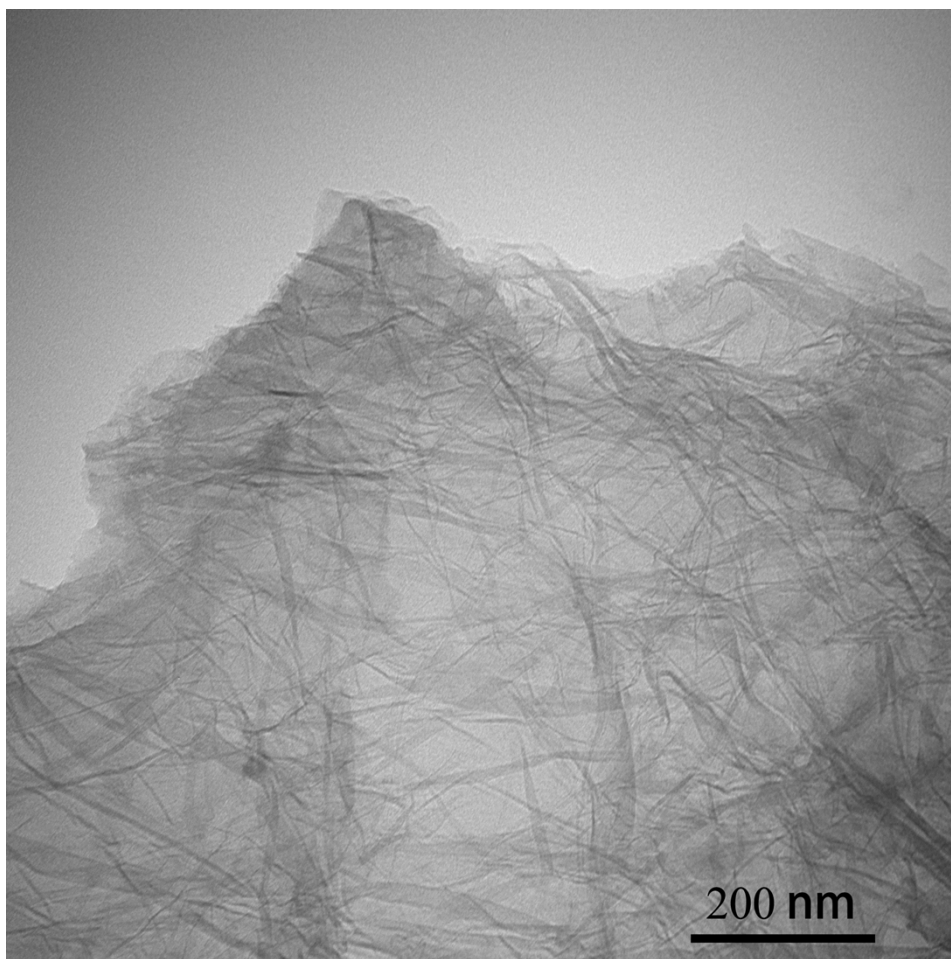

**Fig. S1** TEM image of HG.

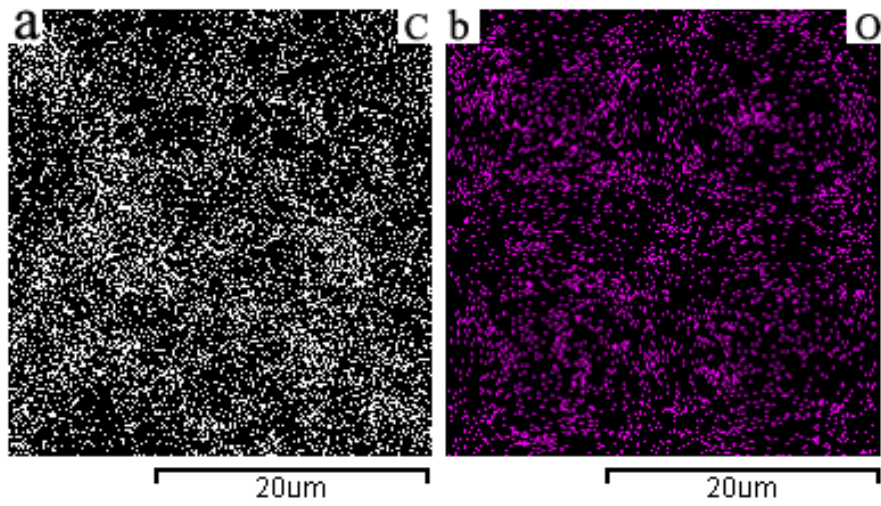

Fig. S2 EDS carbon mapping (a) and oxygen mapping (b) of HG.

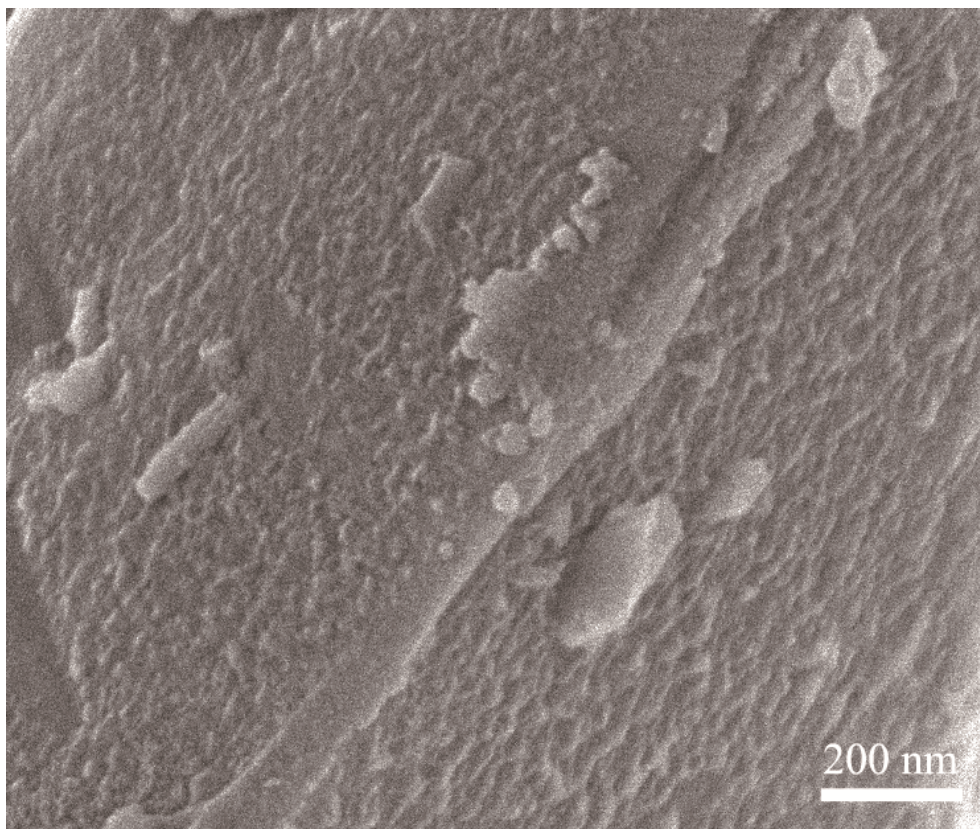

**Fig. S3** SEM image of HG-PEI-0.51.

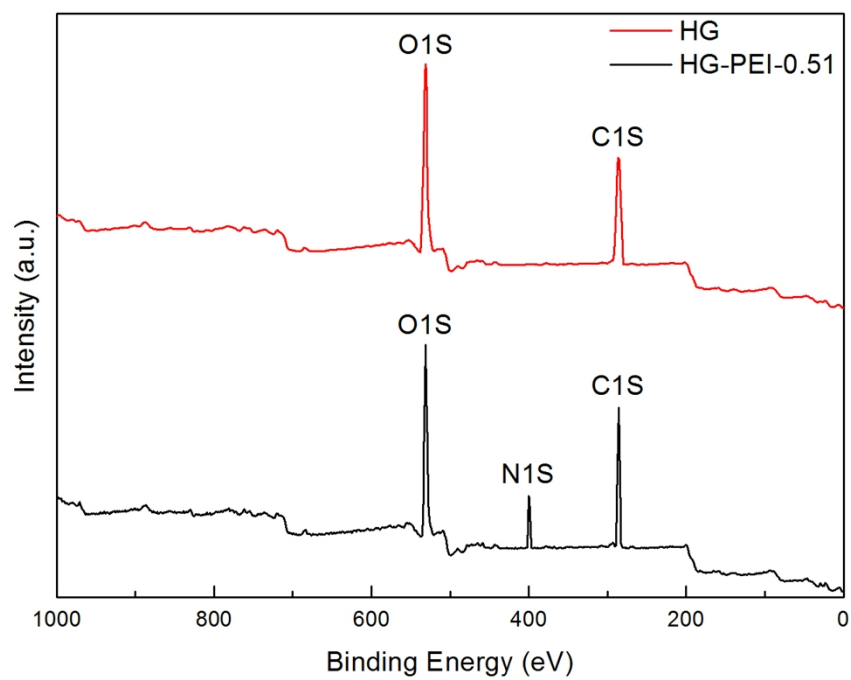

**Fig. S4** Full survey XPS spectrum of HG and HG-PEI-0.51.

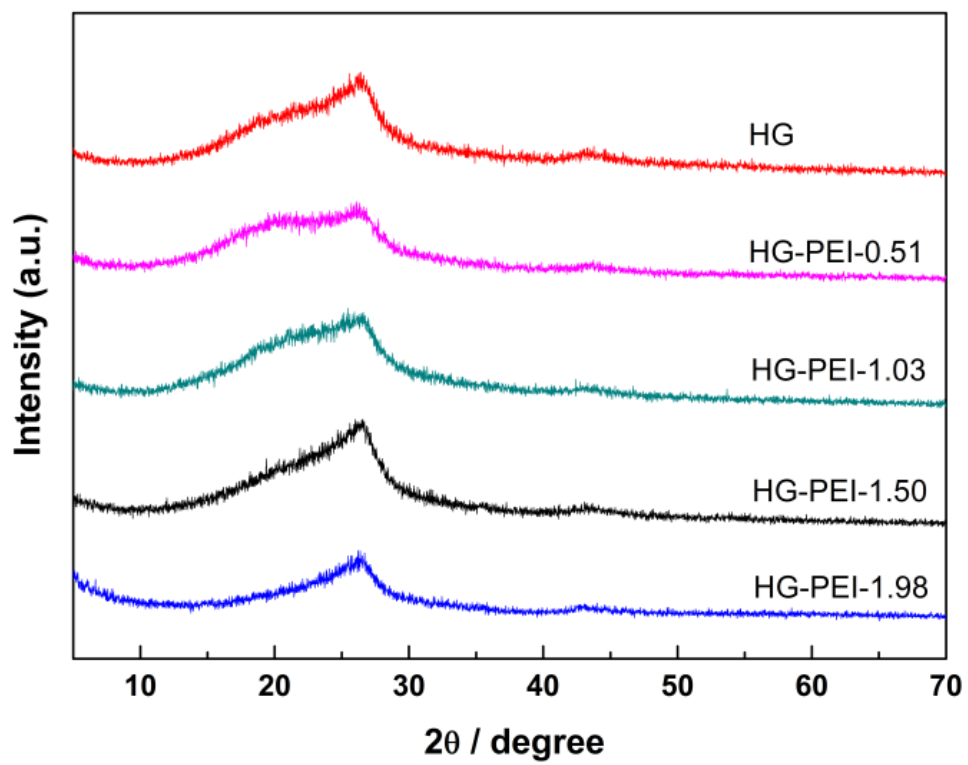

Fig. S5 XRD patterns of HG before and after the polymerization of PEI.

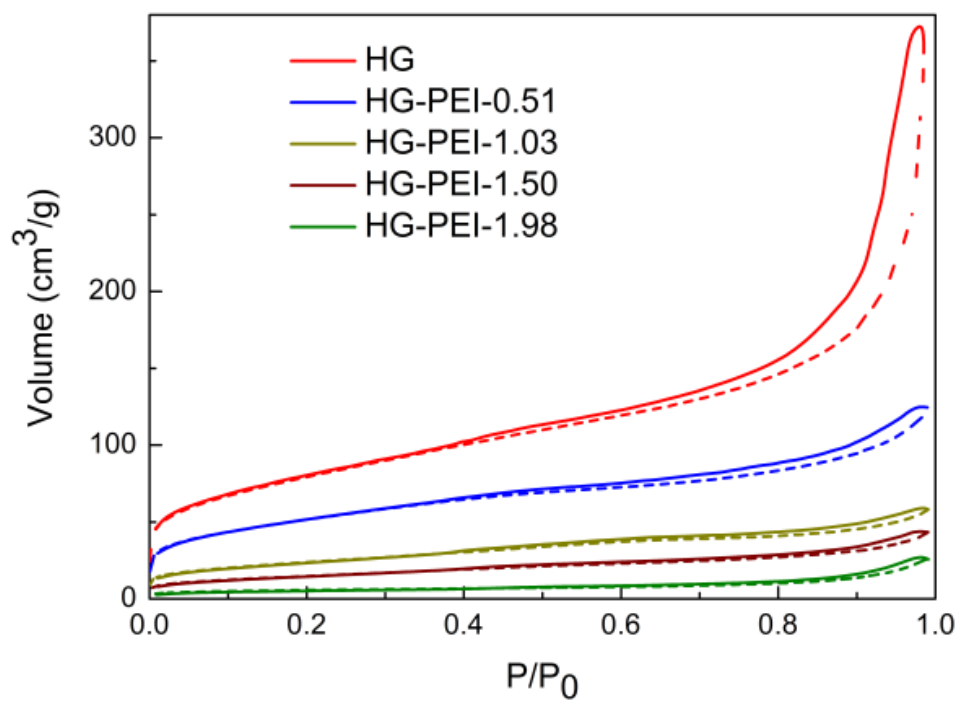

**Fig. S6** Nitrogen adsorption/desorption isotherms of HG and HG-based adsorbents.



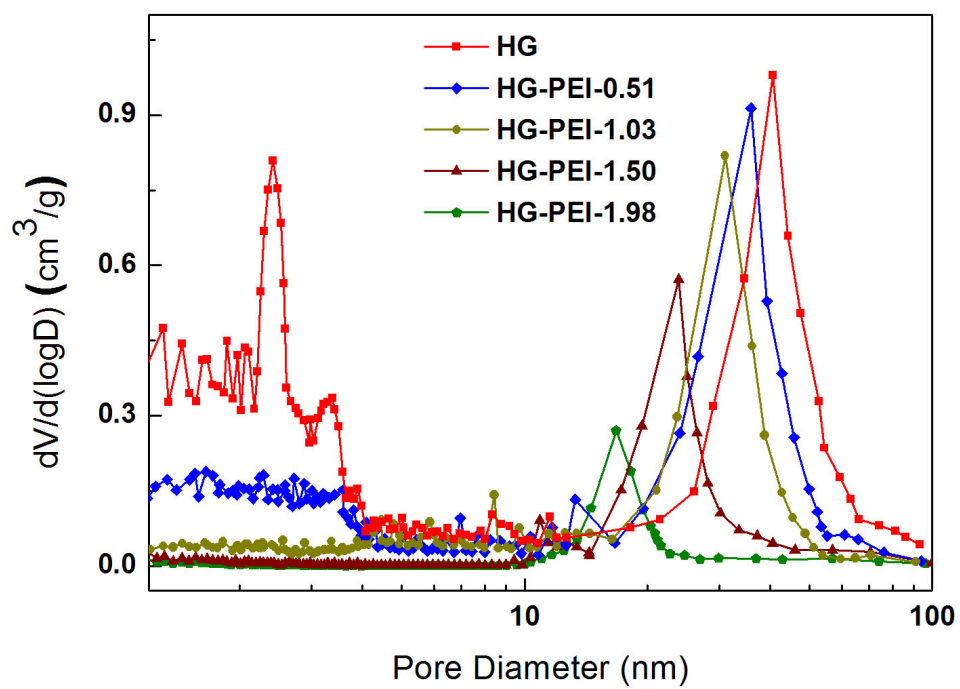

Fig. S7 Pore size distribution calculated from the desorption branch for HG and HG-based adsorbents.

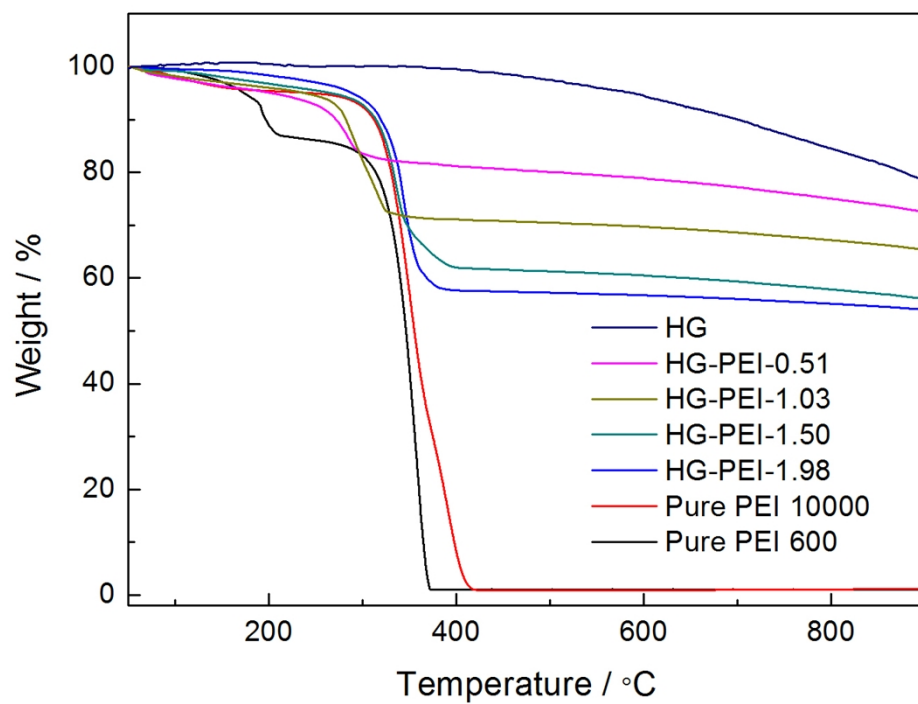

**Fig. S8** TGA thermograms of HG, HG-based adsorbents, and commercial PEI.

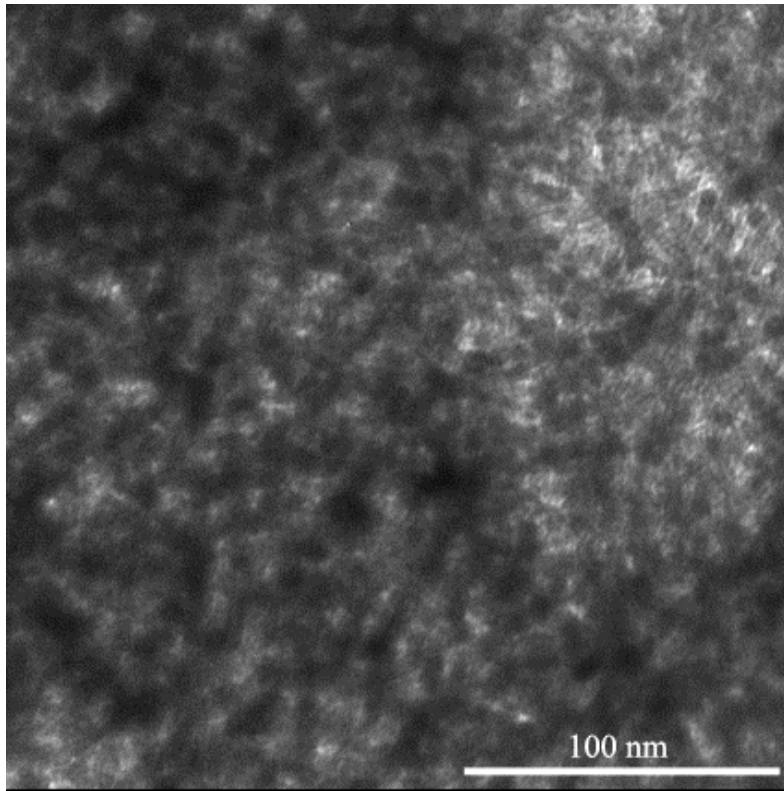

**Fig. S9** TEM image of HG-PEI-0.51.

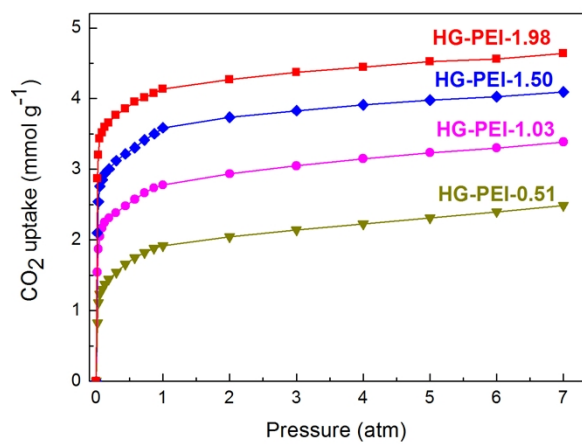

Fig. S10 CO<sub>2</sub> adsorption isotherms measured at 25 °C / 0-7 atm.

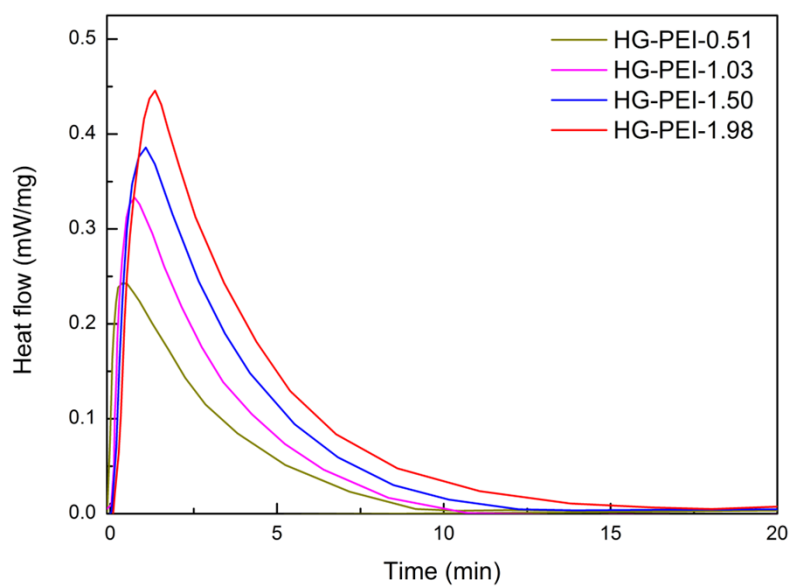

**Fig. S11** DSC heatflow profiles during adsorption process of the HG-PEI adsorbents. The adsorption temperature is 25 °C.

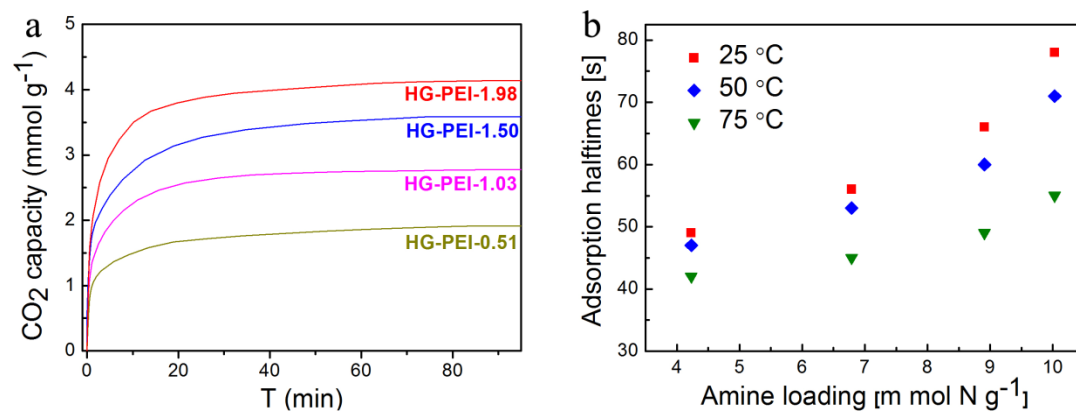

**Fig. S12** (a) CO<sub>2</sub> capture kinetics of HG-PEI adsorbents in 10% CO<sub>2</sub> at 25 °C. (b) Adsorption half-times of the HG-PEI adsorbents in 10% CO<sub>2</sub> at operating temperatures of 25, 50, and 75 °C.

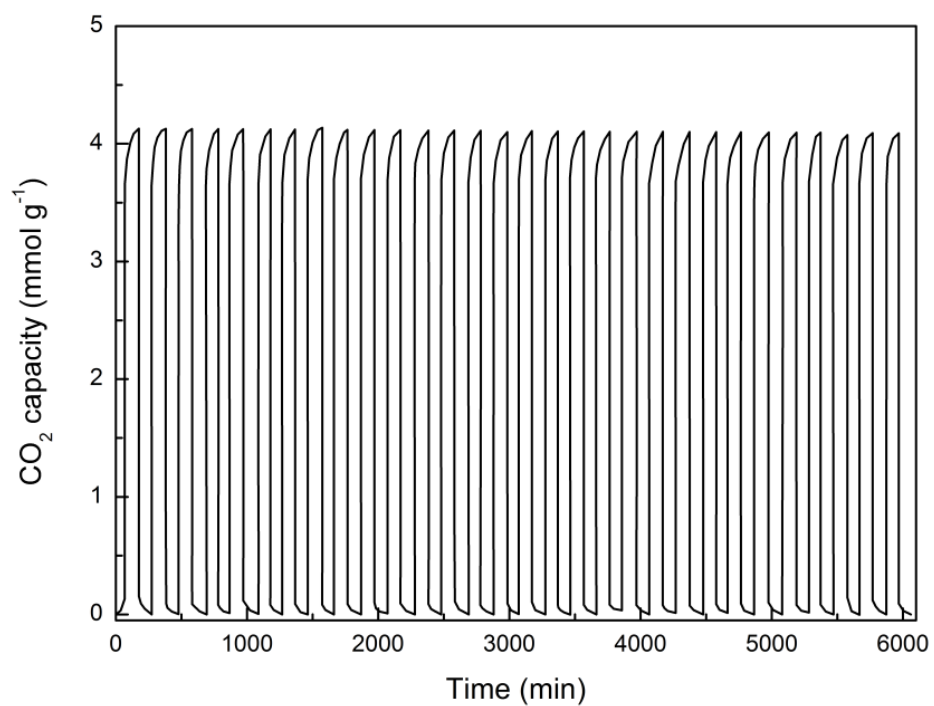

**Fig. S13** The CO<sub>2</sub> adsorption/desorption profile of HG-PEI-1.98. Experimental conditions: adsorption at 25 °C for 60 min in 10% CO<sub>2</sub> and desorption at 100 °C for 60 min in 100% argon.

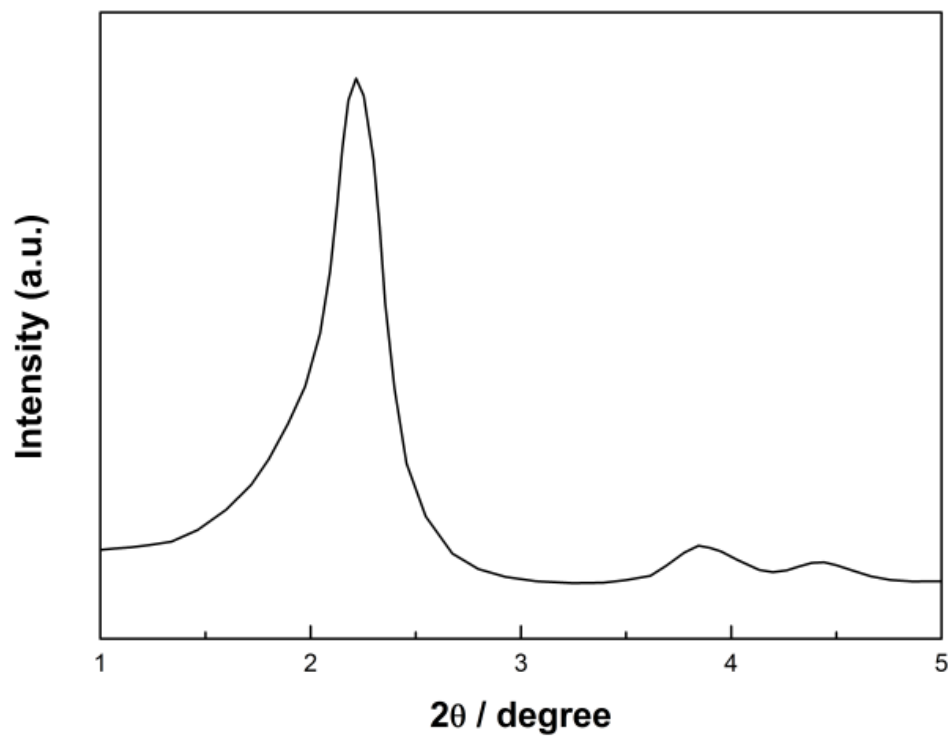

Fig. S14 Powder X-ray diffraction pattern of MCM-41.



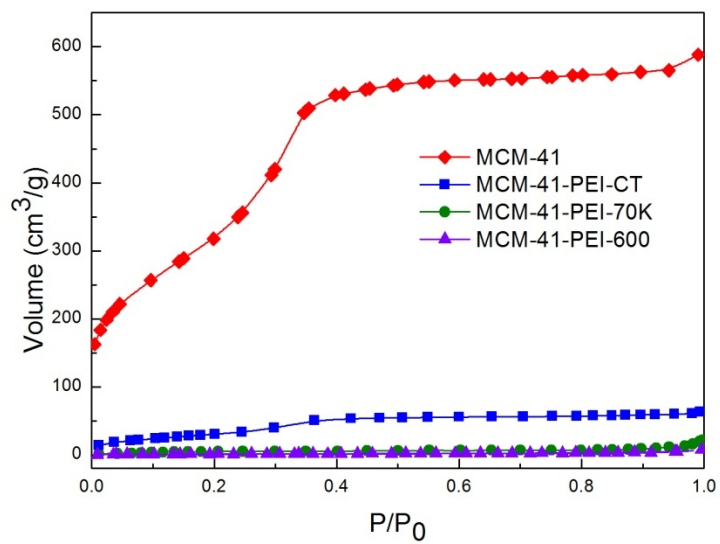

Fig. S15 Nitrogen adsorption/desorption isotherms of MCM-41 and MCM-41-based adsorbents.

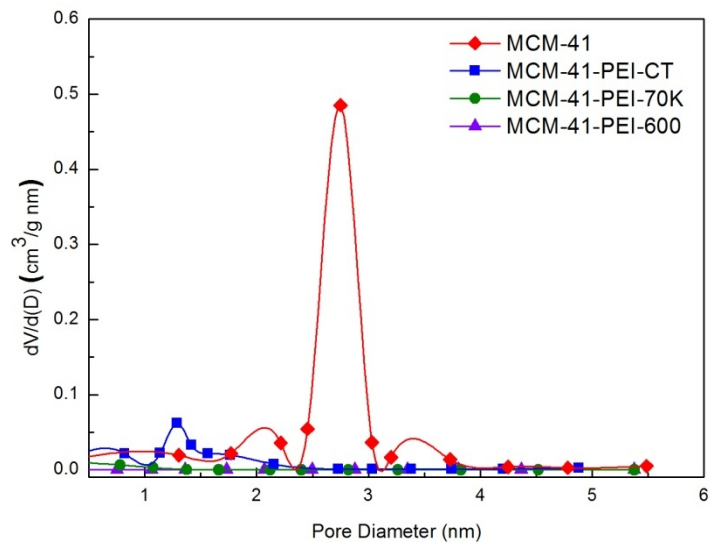

**Fig. S16** Pore size distribution calculated from the desorption branch for MCM-41 and MCM-41-based adsorbents.

## References

1. X. Xu, C. Song, J. M. Andresen, B. G. Miller and A. W. Scaroni, *Energy Fuels*, 2002, **16**, 1463-1469.
